# Supplementary material for: Biological Activities of α-Pinene and β-Pinene Enantiomers
Source: PubMed Central journal article supplement (PMC6268778; doi:10.3390/molecules17066305), 2012-05-25
Supplement: molecules-17-06305-s001.pdf [file molecules-17-06305-s001.pdf]

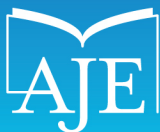

# EDITORIAL CERTIFICATE

This document certifies that the manuscript listed below was edited for proper English language, grammar, punctuation, spelling, and overall style by one or more of the highly qualified native English speaking editors at American Journal Experts.

## Manuscript title:

Antimicrobial Activity of Pinene Isomers and Enantiomers Alone and in Combination with Antimicrobial Drugs

## Authors:

Ana Cristina Rivas da Silva, Paula Monteiro Lopes, Mariana Maria Barros de Azevedo, Danielle Cristina Machado Costa, Celuta Sales Alviano, Daniela Sales Alviano

## Date Issued:

February 26, 2012

## Certificate Verification Key:

5B25-E813-2BC8-1E67-E218

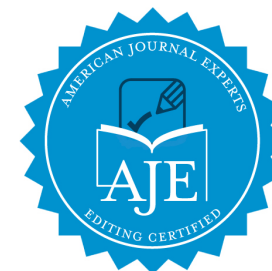

This certificate may be verified at [www.journalexperts.com/certificate](http://www.journalexperts.com/certificate). This document certifies that the manuscript listed above was edited for proper English language, grammar, punctuation, spelling, and overall style by one or more of the highly qualified native English speaking editors at American Journal Experts. Neither the research content nor the authors' intentions were altered in any way during the editing process. Documents receiving this certification should be English-ready for publication; however, the author has the ability to accept or reject our suggestions and changes. To verify the final AJE edited version, please visit our verification page. If you have any questions or concerns about this edited document, please contact American Journal Experts at [support@journalexperts.com](mailto:support@journalexperts.com).
